# Supplementary material for: Measurement report: Bio-physicochemistry of tropical clouds at Maïdo (Réunion, Indian Ocean): overview of results from the BIO-MAÏDO campaign
Source: Copernicus journal article supplement (doi:10.5194/acp-24-4129-2024), 2024-04-08
Supplement: Supplementary file 1 [file acp-24-4129-2024-supplement.pdf]

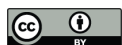

*Supplement of*

**Measurement report: Bio-physicochemistry of tropical clouds at Maïdo (Réunion, Indian Ocean): overview of results from the BIO-MAÏDO campaign**

**Maud Leriche et al.**

*Correspondence to:* Maud Leriche (m.leriche@opgc.fr) and Pierre Tulet (pierre.tulet@aero.obs-mip.fr)

The copyright of individual parts of the supplement might differ from the article licence.

**Table S1. Daily operation of instruments deployed during the campaign. Code 0 = non data, code 1 = normal operation, code 2 = discontinuous operation, code 3 = degraded performance**

|                                                           | 13/03/2019 | 14/03/2019 | 15/03/2019 | 16/03/2019 | 17/03/2019 | 18/03/2019 | 19/03/2019 | 20/03/2019 | 21/03/2019 | 22/03/2019 | 23/03/2019 | 24/03/2019 |
|-----------------------------------------------------------|------------|------------|------------|------------|------------|------------|------------|------------|------------|------------|------------|------------|
| PF NO <sub>x</sub> , NO, NO <sub>2</sub> , O <sub>3</sub> | 2          | 1          | 1          | 1          | 1          | 1          | 1          | 1          | 1          | 2          | 1          | 1          |
| PF SO <sub>2</sub>                                        | 2          | 2          | 2          | 2          | 2          | 2          | 2          | 2          | 2          | 2          | 2          | 2          |
| PF T, RH                                                  | 2          | 1          | 1          | 1          | 1          | 1          | 1          | 1          | 1          | 2          | 1          | 1          |
| PF wind                                                   | 2          | 1          | 1          | 1          | 1          | 1          | 1          | 1          | 2          | 2          | 1          | 1          |
| PF CO                                                     | 2          | 2          | 2          | 2          | 2          | 2          | 2          | 2          | 2          | 2          | 0          | 0          |
| PF CPC                                                    | 0          | 0          | 0          | 0          | 0          | 0          | 0          | 0          | 0          | 0          | 0          | 0          |
| PF PAR                                                    | 1          | 2          | 2          | 2          | 2          | 2          | 1          | 1          | 1          | 1          | 1          | 1          |
| PF PTR-MS                                                 | 2          | 1          | 1          | 1          | 1          | 0          | 0          | 0          | 0          | 2          | 2          | 0          |
| PF HVS PM10                                               | 1          | 1          | 1          | 1          | 1          | 1          | 1          | 1          | 1          | 1          | 1          | 1          |
| PF ceilometer                                             | 2          | 1          | 1          | 1          | 1          | 1          | 1          | 1          | 1          | 1          | 1          | 1          |
| PF HCHO                                                   | 0          | 0          | 0          | 0          | 0          | 0          | 0          | 0          | 0          | 0          | 0          | 0          |
| DOS CPC                                                   | 1          | 1          | 1          | 1          | 1          | 1          | 1          | 1          | 1          | 1          | 1          | 1          |
| DOS SMPS                                                  | 1          | 1          | 1          | 1          | 1          | 1          | 1          | 1          | 1          | 1          | 1          | 1          |
| DOS CNCN                                                  |            | 1          | 1          | 1          | 1          | 1          | 1          | 1          | 1          | 1          | 1          | 1          |
| DOS OPC                                                   | 1          | 1          | 1          | 1          | 1          | 1          | 1          | 1          | 1          | 1          | 1          | 1          |
| DOS Fog Monitor                                           | 1          | 1          | 0          | 0          | 0          | 0          | 0          | 0          | 0          | 2          | 1          | 1          |
| DOS LIDAR                                                 | 2          | 0          | 0          | 0          | 0          | 0          | 2          | 1          | 1          | 2          | 0          | 0          |
| DOS ceilometer                                            | 0          | 0          | 0          | 0          | 0          | 0          | 2          | 1          | 1          | 1          | 1          | 1          |
| DOS PWD                                                   | 0          | 0          | 0          | 0          | 0          | 1          | 1          | 1          | 1          | 1          | 1          | 1          |
| DOS balloon                                               | 1          | 1          | 1          | 0          | 0          | 1          | 1          | 1          | 0          | 0          | 1          | 1          |
| HM all except PTR-MS and SASS                             | 1          | 1          | 1          | 1          | 1          | 1          | 1          | 1          |            | 1          | 1          | 1          |
| HM PTR-MS                                                 | 3          | 3          | 3          | 3          | 3          | 3          | 3          | 3          | 3          | 3          | 3          | 3          |
| HM SASS                                                   | 0          | 0          | 0          | 0          | 0          | 1          | 1          | 1          | 1          | 1          | 1          | 1          |
| PO cloud sampling                                         | 0          | 1          | 1          | 0          | 0          | 1          | 1          | 0          | 1          | 1          | 0          | 0          |
| MO. ACSM                                                  | 1          | 1          | 1          | 1          | 1          | 1          | 1          | 1          | 1          | 1          | 1          | 1          |
| MO HCHO                                                   | 2          | 2          | 2          | 2          | 2          | 2          | 2          | 2          | 2          | 2          | 1          | 1          |
| MO Fog Monitor                                            | 1          | 1          | 1          | 1          | 1          | 1          | 1          | 1          | 1          | 0          | 0          | 0          |
| MO others                                                 | 1          | 1          | 1          | 1          | 1          | 1          | 1          | 1          | 1          | 1          | 1          | 1          |
| MO O <sub>3</sub> , SO <sub>2</sub> , NO <sub>x</sub>     | 1          | 1          | 1          | 1          | 1          | 1          | 1          | 1          | 2          | 1          | 1          | 1          |
| MO CO                                                     | 2          | 1          | 1          | 1          | 1          | 1          | 1          | 1          | 2          | 1          | 1          | 1          |
| MO CPC                                                    | 0          | 0          | 2          | 1          | 1          | 1          | 1          | 1          | 1          | 1          | 1          | 1          |
| MO PTR-MS                                                 | 1          | 1          | 1          | 1          | 1          | 2          | 2          | 1          | 1          | 1          | 1          | 1          |
| MO HVS PM10                                               | 1          | 1          | 1          | 1          | 1          | 1          | 1          | 1          | 1          | 1          | 1          | 1          |

|                               | 25/03/2019 | 26/03/2019 | 27/03/2019 | 28/03/2019 | 29/03/2019 | 30/03/2019 | 31/03/2019 | 01/04/2019 | 02/04/2019 | 03/04/2019 | 04/04/2019 |
|-------------------------------|------------|------------|------------|------------|------------|------------|------------|------------|------------|------------|------------|
| PF NOx, NO, NO2, O3           | 1          | 1          | 2          | 2          | 2          | 1          | 1          | 1          | 1          | 1          | 1          |
| PF SO2                        | 2          | 2          | 0          | 2          | 2          | 2          | 2          | 2          | 2          | 2          | 2          |
| PF T, RH                      | 1          | 1          | 0          | 2          | 2          | 1          | 1          | 1          | 1          | 1          | 1          |
| PF wind                       | 1          | 1          | 2          | 2          | 2          | 1          | 1          | 2          | 1          | 1          | 1          |
| PF CO                         | 2          | 2          | 2          | 2          | 2          | 2          | 2          | 2          | 2          | 2          | 2          |
| PF CPC                        | 0          | 0          | 0          | 0          | 0          | 0          | 0          | 1          | 1          | 1          | 1          |
| PF PAR                        | 1          | 2          | 1          | 1          | 1          | 1          | 2          | 1          | 1          | 1          | 1          |
| PF PTR-MS                     | 0          | 0          | 0          | 1          | 3          | 3          | 1          | 1          | 1          | 1          | 2          |
| PF HVS PM10                   | 1          | 1          | 1          | 1          | 1          | 1          | 1          | 1          | 1          | 1          | 1          |
| PF ceilometer                 | 1          | 1          | 1          | 1          | 1          | 1          | 1          | 1          | 1          | 1          | 1          |
| PF HCHO                       | 0          | 0          | 0          | 2          | 3          | 2          | 1          | 2          | 2          | 1          | 1          |
| DOS CPC                       | 1          | 1          | 1          | 1          | 1          | 1          | 2          | 2          | 1          | 1          | 1          |
| DOS SMPS                      | 1          | 1          | 1          | 1          | 1          | 1          | 2          | 1          | 1          | 1          | 1          |
| DOS CNCN                      | 1          | 1          | 1          | 1          | 3          | 2          | 1          | 1          | 1          | 1          | 1          |
| DOS OPC                       | 1          | 1          | 1          | 1          | 1          | 1          | 1          | 1          | 1          | 1          | 1          |
| DOS Fog Monitor               | 1          | 1          | 1          | 1          | 0          | 1          | 1          | 1          | 1          | 1          | 1          |
| DOS LIDAR                     | 0          | 2          | 1          | 2          | 0          | 0          | 0          | 2          | 3          | 3          | 3          |
| DOS ceilometer                | 1          | 1          | 2          | 1          | 1          | 1          | 2          | 2          | 2          | 2          | 2          |
| DOS PWD                       | 1          | 1          | 1          | 1          | 1          | 1          | 2          | 2          | 1          | 1          | 0          |
| DOS balloon                   | 0          | 1          | 1          | 1          | 1          | 1          | 0          | 1          | 1          | 1          | 1          |
| HM all except PTR-MS and SASS | 1          | 1          | 1          | 1          | 1          | 1          | 1          | 1          | 1          | 1          | 1          |
| HM PTR-MS                     | 3          | 3          | 3          | 3          | 3          | 2          | 1          | 1          | 2          | 1          | 1          |
| HM SASS                       | 0          | 1          | 1          | 1          | 1          | 1          | 1          | 1          | 1          | 1          | 1          |
| PO cloud sampling             | 0          | 1          | 0          | 1          | 0          | 1          | 0          | 1          | 1          | 1          | 1          |
| MO. ACSM                      | 1          | 1          | 1          | 1          | 1          | 1          | 1          | 1          | 1          | 1          | 2          |
| MO HCHO                       | 2          | 2          | 0          | 0          | 0          | 0          | 0          | 0          | 0          | 0          | 0          |
| MO Fog Monitor                | 0          | 0          | 0          | 0          | 0          | 0          | 0          | 0          | 0          | 0          | 0          |
| MO others                     | 1          | 1          | 1          | 1          | 1          | 1          | 1          | 1          | 1          | 1          | 1          |
| MO O3, SO2, NOx               | 1          | 1          | 1          | 1          | 1          | 1          | 1          | 1          | 1          | 1          | 1          |
| MO CO                         | 1          | 1          | 1          | 1          | 1          | 1          | 0          | 1          | 1          | 1          | 1          |
| MO CPC                        | 1          | 1          | 1          | 1          | 1          | 1          | 1          | 1          | 1          | 1          | 0          |
| MO PTR-MS                     | 1          | 1          | 1          | 1          | 1          | 1          | 1          | 1          | 2          | 1          | 1          |
| MO HVS PM10                   | 1          | 1          | 1          | 1          | 1          | 1          | 1          | 1          | 1          | 1          | 1          |

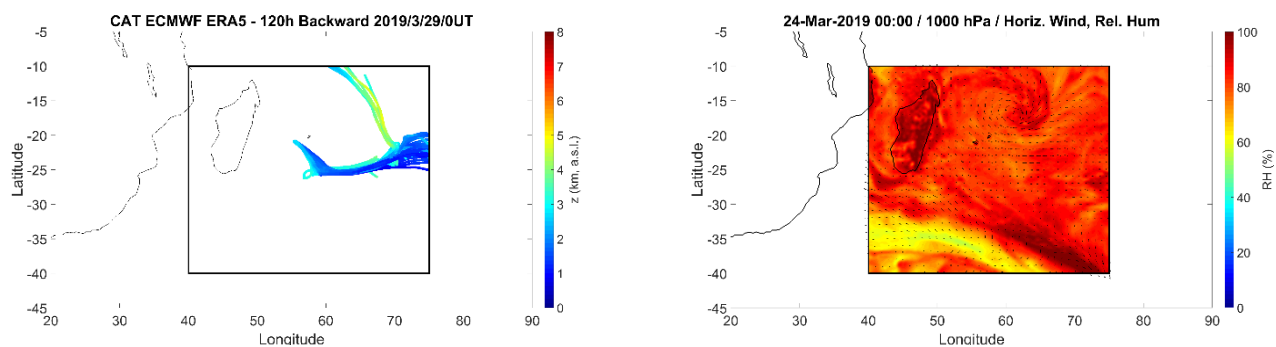

**Figure S1. (a) 5 days back-trajectories arriving to Réunion island calculated with CAT and ECMWF wind fields from the 28 March 2019 at 00 UTC. (b) Horizontal wind field (arrows) and relative humidity (color scale) at 1000hPa the 24<sup>th</sup> of March 2019 at 00 UTC.**
